# Supplementary material for: Human Erbb2-induced Erk activity robustly stimulates cycling and functional remodeling of rat and human cardiomyocytes
Source: eLife. 2021 Oct 19;10:e65512. doi: 10.7554/eLife.65512 (PMC8589446; doi:10.7554/eLife.65512)
Supplement: Source data 1. [file elife-65512-supp2.xlsx]

## Sheet: Figure 1
	Panel B							Panel C							Panel D							Panel E							Panel F							Panel G
	Ctrl LV	caYap8SA	caCtnnb1	carErbb2	cahErbb2	Ccnd2 OE		Ctrl LV	caYap8SA	caCtnnb1	carErbb2	cahErbb2	Ccnd2 OE		Ctrl LV	caYap8SA	caCtnnb1	carErbb2	cahErbb2	Ccnd2 OE		Ctrl LV	caYap8SA	caCtnnb1	carErbb2	cahErbb2	Ccnd2 OE		Ctrl LV	caYap8SA	caCtnnb1	carErbb2	cahErbb2	Ccnd2 OE			Control LV									caYap8SA
	0.971631	1.06619	1.76596	1.64505	1.9078	1.40125		0.72	1.6	2.38	1.16	5.67	1.11		Control LV	74.8	65.6	72.7	50.5	62.9		51	88.3	66.7	92.5	55.9	72.3		1.53	1.2	1.94	1.29	1.79	1.17		Yap	1.0187	0.9145	1.0668	0.9422	1.2193	0.8385	1.4045	0.7078	0.8878	1.5394	2.1246	2.5414	4.1637
	1.07092	1.04786	1.78723	1.70207	1.92199	1.30408		0.53	1.95	1.77	0.63	4.76	1.3		62.4	73.5	66.5	68.6	53.2	65.9		49.8	87.8	66.9	97.3	55.1	74.6		1.24	0.96	1.65	1.89	2.32	0.96		Ctgf	0.9861	1.0066	1.0073	0.9628	1.1168	0.9204	0.771	1.7213	0.5078	1.2756	1.9434	2.1129	12.621
	0.957447	1.08452	1.85816	1.68781	1.83688	1.30721		0.27	2.35	1.12	0.7	3.97	1.76		52.7	71.5	64.1	70.8	58	64.1		52.8	88.3	61.9	97.3	59.2	73.4		1.97	0.64	1.71	1.53	2.1	1.12		Cyr61	0.9669	1.035	0.998	0.9995	1.0903	0.9102	1.1735	1.0521	0.7744	1.2117	1.4269	1.7651	4.1962
	1.01254	0.954119	1.439	1.439	1.18874	1.28571		0.35	0.6	0.61	0.63	0.49	0.93		58	85.6	81.7	82.4	79.1	79.6		84	92.8	93.5	80.6	93.2	88.9		2.87	1.6	1.36	2.04	3.03	2.1
	0.987461	1.20438	1.29823	1.38582	1.23566	1.20751		1.28	0.48	1.25	0.59	0.56	0.69		73.3	67.3	85.9	94.1	79.2	83.6		82.1	88.9	93.7	75.8	94.5	91		2.41	1.5	2.69	2	2.27	2.14
	1	1.28571	1.38895	1.30761	1.37331	1.27946		0.93	0.67	1.61		0.68	0.35		71.1	66.5	90.7	94.5	88	83.6		82.9	85.7	95.8	76.3	97.5	93.1		2.08	0.93	2.02	2.03	2.09	2.07
	1	0.640838	0.986387	1.28167	1.13717	1.00209		0.4	1.31	1.15		1.96	0.9		71.8	26.1	54.8	74.7	68.9	61.5		80.1	50.8	75.3		76.6	68
	0.952245	0.851309	0.920419	1.25969	1.03351	1.10576		0.98	0.38	1.41		3.05	1.01		72.1	31.6	49.1	69.1	63.9	65.8		91.4	57.1	70.3		73.5	74.8
	1.02067	0.659686	1.0178	1.2377	0.980105	1.05864		0.57	1.74	1.23		5.07	1.05		83.8	31.7	52.3	70.5	61.4	60.3		92.1	54.6	73.2		72	68.2
	0.989309		1.58479		1.63743	1.57377		0.64		0.4		2.91	1.23		85.3	65.9	73	79.5	72.7	67.7		90.1		76.3		79.4
	1.03778		1.40351		1.96491	1.57662		0.39		0.65		1.61	0.97		84.2	61.1	77.1	79.2	72.4	74.8		92.9		79.7		83.6
	1.00509		1.48538		2.04678	1.52245		0.46		0.82		0.87			87.4	46.6	75	78.2	72	75.2		90.7		79.4		82.6
	0.989817		1.59615		1.97661	1.59373		0.57		0.49		0.79			82.8	68	76.3		78.8	80.5		93.3		22.5		87.6
	1.00509		1.56923		1.43077			0.51		0.79		0.71			86.2	71.5	74.3		66.7	78.7		73.9		71.6		47.7
	0.98853		1.51538		1.45769			0.47		0.84		1.35			68.5	68.1	47.6		31.5	80.2		74.2		66.1		53.6
	1.01043		1.56539		1.45769			0.65				2.28			68.9		52.9		31.2			72.9		71.4		52.2
	1.00104				1.37308			0.25				1.6			65.1		48.6		33.7			94		66		58.1
	0.995812							0.44				2.29			93.8		51.1		29.7			93.7
	1.09948							0.74				3.1			95.7		67.6		65.6			91.7
	0.904712							0.84							92.7		70.5		66.5			87.3
	1.09942							0.61							93.7		70.4		78.8			77
	0.865497														39.5		74.7		76.6			67.7
	1.09942														36.7		75.2		76.8			78.3
	0.935673														46.3							69.7
	1.04231														37.3
	0.946154														77.1
	1.01154														77.7
	1														75.4
															83.3
															83.3
															85.9
[truncated: 47 more columns]

## Sheet: Figure 1-S1
Panel B							Panel C
Ctrl LV	caYap8SA	caCtnnb1	carErbb2	cahErbb2	Ccnd2 OE		Ctrl LV	caYap8SA	caCtnnb1	carErbb2	cahErbb2	Ccnd2 OE
89.4	56.2	78.2	33.8	56.8	51.9		95	55.2	60.4	52.1	66.2	66.9
85.3	53.7	80.5	34.2	66.1	59.4		96.2	54.5	59.3	45.3	62	63.6
87	52.2	77.1	34.2	62.7	59.1		54.7	34.5	57.5	51.5	60.8	61.4
70.8	35.4	63.7	68.2	61.3	47.5		67.5	24.2	70.7	25.6	26.3	26.8
71.1	36.5	61.8	61.8	57.9	45.1		66.6	21.4	69.6	22.7	22.4	23
69.5	44.3	62.9	60.4	57.4	58.1		73.9	20.1	62.1	27.2	24.1	17.3
69.5	29.8	33.1	67.8	62.6	53.9		79.2	63	29.4	50.2		54.2
94.8	30.3	33.2	68.1	57.2	81.9		79.9	58.9	19.7	47.6		52.2
95.3	33.4	35.1	66.8	58	84.3		79.3	48.5	20.7	46.1		65.9
95	59.1	49	72.3	34.2	83.6		60.2	43.3		33.2		29.1
96.3	54.5	49	76.2	44	75.9		69.3	43		28		29.6
94.7	33.7	49	70.5	39.1	77.5		60.4	29.8		27		40.6
95.3	53.3	75	81.9	43.3	91.8		95.8	13.8		77.4		42.5
95.2	46.3	59.2	86.1	74.2	87.8		96.6	14.7		76		34.1
95.9		60.9	84.2	33	90.4		96.2	15.6		77.2		39.7
95.6		56.8		30.7	78.9		93.8
95.8		59.9		55.8	79.4		94.9
95.6		68		35.8	82.5		93.8
92.9		59.4		76.4	79.3
96		65.1		43.8
72		66.2		53.9
69.6		66.6		46.4
70.9		64.8		57.6
76.7		58.7		73.7
66.8		68.3		61.6
65.5		66.3		55.6
70.2		66.2		54.8
60
85.8
84.2
83.4
82.6
94.2
95.3
95.1
94.9
92.7
95.3

## Sheet: Figure 1-S2
Panel B (left)				Panel B (middle)			Panel B (right)
No LV	Ctrl LV	Ctrl LV+CHIR		Ctrl LV	Ctrl LV+CHIR		Ctrl LV	Ctrl LV+CHIR
1.13475	0.971631	2.48903		0.72	1.46		1.53	9.65
0.992908	1.07092	2.45454		0.53	1.18		1.24	9.76
0.971631	0.957447	2.45768		0.27	0.92		1.97	9.06
1.07749	1.01254	2.5047		0.35	1.16		2.87	10.3
1.08377	0.987461	2.36921		1.28	2.11		2.41	8.41
1.00209	1	2.36636		1.81	0.76		2.08	10.2
1.12865	1	2.38632		0.93	0.52
1.05848	0.952245	2.39772		0.4	1.45
1.12281	1.02067	1.92388		0.98	1.29
1.22807	0.989309	1.99896		0.57	1.58
	1.03778	1.98019		0.64	0.97
	1.00509	2.14869		0.39	1.02
	0.989817	2.14555		0.46
	1.00509	2.20524		0.57
	0.98853	2.94737
	1.01043	2.83041
	1.00104	2.97661
	0.995812	2.94737
	1.09948	2.05769
	0.904712	2.03846
	1.09942	2.05769
	0.865497	2.05385
	1.09942
	0.935673
	1.04231
	0.946154
	1.01154
	1

## Sheet: Figure 1-S3
Panel B				Panel C			Panel D
Stand.	Mills Ctrl	MM		MM Ctrl LV	MM cahErbb2		MM Ctrl LV	MM cahErbb2
1.01119	1.09091	0.73007		0.92436	2.06897		0.099	0.56
1.01958	0.868531	0.834965		1.06785	1.95217		0.31	0.68
0.969231	1.24615	0.709091		1.00779	2.15239		0.26	0.5
0.954955	0.873874	0.887387		0.927529	1.39482		0.56	0.89
1.04054	0.801802	0.86036		1.12941	1.11106		0.58	0.8
1.0045	0.90991	0.936937		0.943059	1.48235		0.4	1.57
0.982919	0.759317	0.306056		1.2226	1.95206		0.04	0.42
0.964286	0.48913	0.372671		1.27397	2.28082		0.079	0.74
1.05279	0.852484	0.31118		0.503425	2.57877		0.19	1.48
1.07572	0.821826	0.185078
0.955457	0.761693	0.213808
0.96882	0.895323	0.201782

## Sheet: Figure 2
Panel B							Panel C							Panel D							Panel E							Panel G
Ctrl LV	caYap8SA	caCtnnb1	carErbb2	cahErbb2	Ccnd2 OE		Ctrl LV	caYap8SA	caCtnnb1	carErbb2	cahErbb2	Ccnd2 OE		Control LV	caYap8SA	caCtnnb1	carErbb2	caErbb2	Ccnd2 OE		Control LV	caYap8SA	caCtnnb1	carErbb2	caErbb2	Ccnd2 OE			Control LV									cahErbb2
0.95122	1.02439	1.14822	1.07886	1.65478	1.00751		0.73	0.48	0.71	0.54	1.28	1.08		74.4	57.6	70.9	45.7	70.8	66.4		53.2	51.5	42.6	25	43.3	40.1		Erbb2	0.9728	1.2008	0.8264	0.8101	1.0984	1.0915	0.4459	1.3549	1.1992	3.0953	3.0019	3.4763	3.6111	6.0581	6.2279	3.678	6.8267
0.844278	0.990619	1.5985	0.733438	1.4409	1.0863		0.33	0.43	0.6	0.23	0.85	1.56		79.2	59.3	67	44.1	77.7	59.6		64.2	42.5	53.6	21.2	51.6	32.8		Myh6	0.8044	1.2332	0.9625	2.3584	0.2227	0.419	2.2158	0.2321	0.5521	2.3425	3.0652	3.6726	0.1806	0.3706	1.0203
1.2045	1.23827	1.00188	0.864097	1.64916	1.05253		0.71	0.82	0.53	0.22	1.19	0.88		84.6	54	66.2	40.1	78.9	60.4		71.8	37.7	48.6	18.1	55.2	38.8		Myh7	0.9741	0.8752	1.1506	1.0489	1.0694	0.8817	1.3707	0.8264	0.8029	0.5773	0.6285	0.5102	0.4568	0.5485	0.54	1.048	2.4272
0.922414	1.45259	0.501577	1.23276	2.28803	0.918103		0.43	0.53	0.46	0.51	1.78	0.67		71.7	40.4	49.9	52.3	36	41.3		46.2	27.9	39.9	70.1	20.2	23		Tnnt2	0.8328	0.94	1.2272	1.9799	0.465	0.5551	1.6573	0.6484	0.6943	0.9527	1.0042	0.9134	0.4952	0.8831	1.4331
1.20259	1.43535	1.14511	1.19397	2.64097	1.43535		0.46	0.51	0.21	0.43	0.9	0.7		75.5	40	63.5	49.8	32.6	43.8		53.3	24.3	57	69.2	19.1	20.7		Runx1	0.8564	1.5687	0.5748	0.8532	1.4626	0.6842	0.6069	1.3931		3.2113	2.4853	5.0484	2.6775	6.6305	7.9559	0.632	1.0441
0.875	1.61207	2.11987	0.844828	2.21501	0.422414		0.32	0.37	0.25	0.44	1.24	0.37		77.2	35.1	53.8	48.5	48.5	46.1		54.1	22.6	48.6	68.3	27.2	34
0.987854	0.846154	0.602434	1.04453		0.959514		0.13	0.28	0.5	0.3		0.45		91.3	87.4	26.7	87.5		85.7		79	70.4	11.1	42.7		68.6
1.2753	0.898785	2.45842	0.927126		0.854251		0.22	0.3	1.47	0.36		0.3		92.1	85.4	18.4	87.3		86.1		85.3	68.2	9.95	40.3		66.6
0.736842	0.923077	2.16633	0.927126		1.09312		0.22	0.29		0.27		0.41		92.9	87.1	20.5	87.1		89.2		80.1	69.2	10.7	32.8		77.8
1.03378	0.942568		1.17568		1.03378		0.18	0.43		0.28		0.87		85.1	76.3		77.1		70.4		60.4	39.1		56.1		31.4
1.35304	1.10473		1.125		0.983108		0.15	0.29		0.17		0.36		88.5	76.2		74.9		67.5		75.2	47.8		52.5		27.3
0.613176	1.25676		1.17568		1.08953		0.059	0.47		0.17		0.71		86.3	68.1		70.2		77.4		58	38.6		55.7		45.3
0.993691	0.699797		1.25867		0.576876		0.79	0.57		0.11		0.45		75.7	13.7		63		30.5		70.5	11.9		28.1		12
0.998423	3.05477				2.43408		0.65	0.55		0.23		0.51		75.2	23.3		61.4		29		71.9	17.8		46.5		30.7
1.00789	1.80122				2.28803		0.55	1.01		0.086		0.77		71.9	17.7		65.5		29.4		74.2	15.6		37.3		22.6
1.39959							0.14							61							58.7
0.485598							0.06							61.6							53.8
1.11481							0.17							67.5							54.2

## Sheet: Figure 2-S1
Panel A (left)			Panel A (right)			Panel B (left)			Panel B (right)
Ctrl LV	cahErbb2		Ctrl LV	cahErbb2		Ctrl LV	cahErbb2		Ctrl LV	cahErbb2
11.7	11.2		27.4598	24.6419		1.01461	0.980953		0.994148	1.08585
11.6	9.9		12.9214	19.3052		1.00879	0.867328		0.99697	1.09301
12.1	10		21.5826	16.4836		0.976593	0.860714		1.00888	1.09698
7.4	12.6		24.7781	21.8822		0.994187	1.03794		1.00325	0.929699
2.9	6.1					1.02195	1.01256		1.00138	0.918676
2	6.9					0.983862	1.07304		0.995366	0.822429
5.2	6.3					0.992483	1.02644
1.2	5.7					1.0231	1.07556
						0.984418	1.03923
						0.962023	1.10911
						0.972843	1.15256
						1.04549	1.18007
						1.01964	1.00082
						0.989558	0.984078
						1.03024	0.988108
						0.983814	0.989767
						0.996393	1.05289
						0.998069	1.0735
						1.01316	1.06903
						0.988768	1.07678
						0.993437	0.999519
						1.02168
						0.984881

## Sheet: Figure 3
Panel C							Panel D							Panel E							Panel F							Panel G							Panel H							Panel I (left)
Ctrl LV	caYap8SA	caCtnnb1	Ccnd2 OE	carErbb2	cahErbb2		Ctrl LV	caYap8SA	caCtnnb1	carErbb2	cahErbb2	Ccnd2 OE		Ctrl LV	caYap8SA	caCtnnb1	carErbb2	cahErbb2	Ccnd2 OE		Ctrl LV	caYap8SA	caCtnnb1	Ccnd2 OE	carErbb2	cahErbb2		Ctrl LV	caYap8SA	caCtnnb1	carErbb2	cahErbb2	Ccnd2 OE		Ctrl LV	caCtnnb1	cahErbb2	carErbb2	Ccnd2 OE	caYap8SA			Ctrl LV
3.77	7.69	7.56	16.03	18.54	19.13		53.7873	53.9138	28.2552	39.8471	126.597	28.8276		29.8484	32.8763	20.5333	24.0551	46.5774	19.8211		0.345252	1.79362	4.20517	1.68266	1.96794	12.4713		0.109434	0.081176	0.083959	0.135136	0.10903	0.107324		1.885	1.94	0.896	1.581	2.369	2.672		4	0.05	0.036	0.172	0.03	0.047	0.06	0.124
9.44	9.35	10.58	10.5	14.59	35.48		57.0322	36.3608	31.269	40.755	95.445	37.6648		29.7572	23.4555	19.769	24.7212	40.2124	26.0469		1.1203	2.51261	2.33555	1.31517	1.53212	12.175		0.108272	0.102426	0.081395	0.107446	0.129088	0.077054		1.664	2.064	0.82	1.645	2.394	2.441		8	0.158	0.224	0.44	0.177	0.119	0.293	0.26
10.73	3.61	7.5	13.5	22.68	17.07		50.5616	34.2092	48.4546	41.7844	83.0861	25.8217		35.2815	21.1514	26.3007	26.1415	32.3705	19.0305		1.01905	1.35168	0.687326	1.64701	1.34273	7.44293		0.124423	0.085981	0.123743	0.117585	0.093506	0.107835		2.092	2.128	0.807	1.465	1.926	1.672		12	0.445	0.577	1.114	0.45	0.318	0.84	0.417
4.05	14.29	13.22	12.25	22.93	19.21		56.8416	55.8313	27.5443	35.1288	128.639	25.6923		29.1536	31.5194	18.0062	22.5558	61.1971	20.4079		0.466733	1.25821	0.531453	2.67194	0.721245	20.6867		0.101269	0.090573	0.085495	0.160235	0.102113	0.104151		2.034	1.929	0.747	1.249	1.988	1.826		16	1.037	1.263	2.316	1.207	0.667	2.106	0.65
4.31	9.07	25.39	9.18	26.58	16.28		31.9	67.1289	43.4834	67.3153	156.466	33.2965		22.7623	36.7743	28.63	44.595	42.4197	23.6114		0.232594	1.50278	0.592201	2.76186	3.43362	8.91982		0.071895	0.097534	0.073072	0.08182	0.09889	0.081234		1.415	1.919	1.269	0.448	1.943	1.48
6.19	14.11	3.88	24.52	16.89	13.74		30.9383	47.6176	38.876	57.2673	93.4487	29.8291		34.2139	28.6851	23.279	28.3657	64.7898	23.8097		1.49839	0.535091	1.54976	0.598866	2.47459	11.1213		0.090725	0.089202	0.057136	0.077013	0.108389	0.089508		1.658	2.187	1.011	1.76	1.959	1.261
3.37	8.71	18.87	13.89	11.88	11.19		55.1149	36.3944	39.6726	44.5288	111.325	39.0928		33.7185	22.5905	25.2437	29.6313	28.2027	31.1642		0.331572	0.923495	0.562318	1.31729	1.22655	7.26192		0.087009	0.058596	0.078044	0.069711	0.11048	0.078638		2.628	2.969	1.814	2.046	2.261	1.63
1.3	7.4	11.73	13.87	24.15	17.21		37.137	46.1223	41.1908	51.7112	235.605	31.9713		26.0262	27.1013	29.0682	32.6879	49.1613	21.8717		1.079	2.0524	1.94406	0.562136	1.86612	6.63213		0.097194	0.094152	0.060221	0.075438	0.11837	0.081306		2.83	2.551	1.597	2.22	2.112	1.598
4.05		21.19	5.39	21.43	20.96		48.4272		77.3146	35.6673	71.269			27.149		39.7783	14.4795	23.6595			1.16219		3.44829		4.31214	1.39298		0.084749				0.067841			2.026	3.916	1.058	2.054	2.051	2.836
7.42		9.18	8.47	16.79	28.86		54.0585		42.7449	43.4239	68.6631			32.7749		24.8043	17.6093	27.3667			2.21348		3.69034			1.32327		0.082593				0.062232			1.567	3.305	1.158	1.976	1.811	2.749
3.33		5.45	7.38	1.95	28.38		48.645		57.7646	56.0467	101.479			31.5066		31.3854	20.0992	32.6337			0.992981		7.89414			1.77049		0.067199				0.085735			2.938	2.33	1.142	0.674	1.758	2.777
5.45			6.13	9.72	19.11		36.1666		49.7532	49.9849	72.4761			23.3487		30.6404	22.0391	21.5459			1.50199					1.43227		0.07517				0.106462			2.733	1.616	1.125	0.749	1.882	2.655
4.86				18.26	19.81		49.1324				33.3412			22.6536				67.503			1.38893					5.94291		0.058994				0.12941			2.532	2.352	1.042	3.394	2.1
9.13				12.73	19.46		54.4816				38.4258			32.0183				85.6414			1.13782					4.26862		0.087721				0.123799			3.054	2.388	1.07	2.936	2.256
8.07				17.25	16.59		28.1676				49.0963			21.0439				73.5554			1.26701					5.74508		0.066595				0.11868			1.954	2.261	1.169	3.358	2.103
7.59				8.02	18		34.6578				32.044			18.9942				71.1611			0.75006					3.44337									2.053	2.568	1.1	3.101	1.877
8.56					28.8		87.5146				135.124			33.2519				81.6258			2.52021					10.0972									3.715	0.841	0.766	2.17	2.274
10.82					31.69		46.4062				165.166			36.1363				118.87			1.80471					2.07793									3.295	0.973	0.854		2.339
11.83					32.32		49.7432				153.11			29.6416				96.6936			1.63444					14.8445									2.399
7.45					32.42		94.3129				137.202			36.7484				106.347			2.19489					5.12412									2.457
2.86					30.97		59.6848				219.018			46.7129				146.701			0.990609					5.19312									3.806
3.17					24.37		63.5865				222.299			45.7339				155.629			1.63937					3.23613									3.767
2.13					21.24		60.4005				150.464			44.1902				141.889			1.50597					0.788844									1.194
2.43					29.71		71.5404				176.183			28.355				129.935			2.99293					14.275									1.294
3.27					20.25		92.831				291.875			27.9308				83.7284			2.30136					23.6782									1.99
3.08					24.28		87.1054				280.664			33.7049				78.911			1.59145					25.0723									2.204
3.8					15.75		89.1522				267.976			33.0048				81.2124			1.72591					28.4145									1.918
3.6					15.26		84.431				100.417			27.4537				83.6693			2.15433					4.58187									1.826
2.49					37.62		45.1757				106.863			37.1218							1.42309					19.999									1.828
3.98					10.32		55.0888				98.7684			36.1184							1.21912					19.7358									1.806
4.34					20.13		69.8178				108.566			33.6766							1.63444					12.849									2.805
2.4					45.8		72.8588							36.5882							2.6308					11.8315									3.189
0.97							70.285							29.6042							1.98044														2.393
11.52							67.4254							40.014							2.25467														2.594
3.89							63.0847							36.0912							1.86396
2.27							69.4423							29.8455							2.00538
9							34.874							26.3854							1.61977
10.35							61.2793							24.6952							2.11015
6.32							52.533							31.7851							1.68975
8.47							36.1818							24.3551							1.50196
							32.0268														1.90262
																					1.71091
																					1.35126
																					2.33685
[truncated: 115 more columns]

## Sheet: Figure 3-S1
Panel B (left)			Panel B (right)			Panel C (left)			Panel C (right)			Panel D			Panel E (left)
noLV	Ctrl LV		noLV	Ctrl LV		noLV	Ctrl LV		noLV	Ctrl LV		no LV	Ctrl LV			no LV
7.65	3.77		11.85	10.34		37.6105	53.7873		24.5331	29.8484		1.948	1.885		4	0.034	0.039	0.047	0.064	0.089	-0.315	0.094	0.069	0.049	0.064	0.091	0.036	0.028	-0.011	0.03	0.536	0.019	0.119	0.052	0.033	0.058	0.257	0.078	0.008	0.289	0.331	0.251	0.368	0.008	0.067	0.036	-0.008	0.24	0.026
8.49	9.44		28.1	11.58		44.0121	57.0322		25.6735	29.7572		1.675	1.664		8	0.144	0.083	0.201	0.147	0.246	-0.074	0.489	0.248	0.232	0.161	0.315	0.091	0.092	0.019	0.099	1.81	0.072	0.517	0.218	0.116	0.202	0.834	0.306	0.083	0.589	1.055	1.002	1.239	0.105	0.248	0.081	0.02	1.258	0.081
7.67	10.73		8.52	11.99		42.5049	50.5616		25.8004	35.2815		2.626	2.092		12	0.329	0.238	0.605	0.282	0.68	0.21	1.529	0.715	0.906	0.473	0.807	0.274	0.409	0.069	0.273	4.292	0.373	1.496	0.572	0.517	0.573	1.946	0.966	0.3	1.725	2.429	2.647	2.825	0.297	0.782	0.301	0.164	3.156	0.173
7.77	4.05		11.04	9.06		37.062	56.8416		23.1365	29.1536		2.413	2.034		16	0.791	0.503	1.412	0.736	1.783	0.97	3.24	1.771	2.343	1.277	2.059	0.771	1.438	0.296	1.221	6.998	1.091	3.06	1.426	1.357	1.767	4.48	2.379	0.943	3.42	4.021	5.134	4.94	0.876	1.904	0.882	0.793	7.522	0.46
9.15	4.31		4.76	6.03		36.0055	31.9		26.5364	22.7623		1.667	1.415
4.22	6.19		6.33	7.07		49.0361	30.9383		32.4101	34.2139		1.932	1.658
4.1	3.37		8.23	4.74		49.2321	55.1149		32.4566	33.7185		2.054	2.628
7.43	1.3		6.03	3.29		30.2078	37.137		24.0663	26.0262		2.678	2.83
2.71	4.05		11.36	4.24		66.7498	48.4272		40.3838	27.149		3.425	2.026
4.8	7.42		4.65	10.37		36.4225	54.0585		22.1478	32.7749		3.035	1.567
4.06	3.33		15.94	5.8		74.2295	48.645		48.064	31.5066		2.131	2.938
5.38	5.45		10.72	11.11		37.2792	36.1666		21.31	23.3487		2.452	2.733
2.05	4.86		3.27	6.52		61.6742	49.1324		49.9813	22.6536		2.365	2.532
0.92	9.13		1.53	10.29		60.7304	54.4816		48.6627	32.0183		2.299	3.054
2.75	8.07		2.6	8.5		58.1557	28.1676		40.0097	21.0439		2.83	1.954
2.63	7.59		3.81	8.19		54.8256	34.6578		43.3237	18.9942		2.504	2.053
2.06	8.56		20.81	15.58		56.0709	87.5146		29.2424	33.2519		2.891	3.715
3.06	10.82		9.8	12.59		50.8693	46.4062		30.807	36.1363		2.803	3.295
5.41	11.83		7.99	12.47		57.6799	49.7432		31.6585	29.6416		3.054	2.399
4.32	7.45		6.44	17.83		54.0401	94.3129		29.5916	36.7484		2.874	2.457
	2.86			0.72		39.5818	59.6848			46.7129		3.266	3.806
	3.17			1.61		41.0808	63.5865			45.7339		3.134	3.767
	2.13			4.28		43.111	60.4005			44.1902		2.93	1.194
	2.43			0.34		42.3392	71.5404			28.355		2.883	1.294
	3.27			20.52			92.831			27.9308		2.805	1.99
	3.08			15.76			87.1054			33.7049		2.778	2.204
	3.8			15.97			89.1522			33.0048		1.667	1.918
	3.6			21.03			84.431			27.4537		1.711	1.826
	2.49			3.52			45.1757			37.1218		2.359	1.828
	3.98			4.58			55.0888			36.1184		2.243	1.806
	4.34			4.87			69.8178			33.6766		2.291	2.805
	2.4			3.45			72.8588			36.5882		2.299	3.189
	0.97			2.54			70.285			29.6042		1.628	2.393
	11.52			12.79			67.4254			40.014		1.433	2.594
	3.89			5.25			63.0847			36.0912
	2.27			2.51			69.4423			29.8455
	9			11.71			34.874			26.3854
	10.35			10.34			61.2793			24.6952
	6.32			6.3			52.533			31.7851
	8.47			10.54			36.1818			24.3551
							32.0268

## Sheet: Figure 3-S2
Panel A							Panel B							Panel C							Panel D														Panel E
Ctrl LV	caYap8SA	caCtnnb1	carErbb2	cahErbb2	Ccnd2 OE		Ctrl LV	caYap8SA	caCtnnb1	carErbb2	cahErbb2	Ccnd2 OE		Ctrl LV	caYap8SA	caCtnnb1	carErbb2	cahErbb2	Ccnd2 OE			Ctrl LV						cahErbb2							Ctrl LV	cahErbb2
328	168	208	223	297	272		56	35	34	55	60	47		193	184	108	129	154	151		-8	0	0	0.041	0	0	0	0	0	0	0	0	0		1.347	0.542
284	235	240	216	320	253		47	35	44	54	58	38		150	180	128	111	181	139		-4	0.027	0.212	0	0.011	0.045	-0.017	0.182	0.027	0.033	0.351	0.005	0.036		1.126	0.457
236	256	252	243	336	234		42	33	34	41	62	33		126	136	133	77	188	128		0	0.104	0.559	0.195	0.056	0.023	0.006	1.393	0.11	0.267	1.022	0.025	0.173		1.422	0.972
288	273	287	224	317	246		58	36	47	35	59	38		159	192	159	89	171	129		4	0.261	0.663	0.256	0.257	0.117	0.064	5.338	0.65	0.559	2.064	0.089	0.68		0.869	0.521
265	283	298	164	318	214		42	42	44	40	58	37		141	288	157	127	166	107		8	0.782	0.955	0.427	1.009	0.31	0.273	11.838	2.112	0.678	4.619	0.348	2.134		0.814	0.335
312	312	276	189	321	200		49	45	52	44	55	37		154	187	155	129	180	100		12	1.809	1.633	0.71	2.968	1.003	0.939	21.074	6.285	1.939	8.35	0.955	4.583		1.028	0.285
270	307	289	243	321	279		35	44	42	41	53	45		121	92	87	108	167	159		16	4.443	2.977	1.556	6.529	3.383	2.544	29.32	12.102	5.225	12.956	2.895	8.936
276	241	300	204	311	269		47	29	46	39	50	53		138	88	155	116	164	150
261	313	250	223	282	260		47	28	42	37	52	44		142	126	164	117	147	143
249	412	278	244	329	222		47	29	37	41	52	36		126	146	134	108	176	148
236	325	275	206	320	272		43	35	41	40	56	33		127	129	162	116	174	119
257	238	266	236	331	259		38	38	49	52	58	46		124	135	155	116	175	144
252	232	237	229	281	240		42	34	47	42	48	47		131	130	145	108	144	133
253	237	226	251	306	216		33	31	41	35	49	35		125	125	117	121	145	133
322	213	210	221	285	228		30	28	35	33	50	37		147	125	120	138	159	112
287	296	235	223	279	229		31	31	32	32	51	37		149	113	109		146	119
247	299	180		280	223		43	31	32	32	51	37		189	162	125		145	122
248	218	185		289	287		44	35	42	33	48	36		145	160	84		142	124
285	242						38	38						132	110
291	263						37	34						134	140
270	247						30	34						124	139
288	233						32	39						141	139
229	284						32	37						150	129
214	312						30	38						149	164
265	209						46	39						161	173
264	230						45	44						110	106
238	231						44	32						100	106
240	305						35	46						123	105
231							36	48						137	172
218							34							126
234							31							127
224							36							130
236							40							110
251							37							110
242							38							109
214							36							125
211							34							105
														126

## Sheet: Figure 3-S3
Panel A (left)			Panel A (middle-left)			Panel A (middle-right)			Panel A (right)
Ctrl	1.4x		1x	1.4x		1x	1.4x			1.4x												cahErbb2
1.19068	1.77542		53.2188	141.132		25.4366	94.9942		Total CSA	1.06422	0.865479	0.61023	0.740526	0.604565	0.685336	0.656544	0.936809	0.624779	0.871163	0.750912	0.684934	0.954615	0.719709	0.626516	0.97001	1.17984	0.704656	0.839451	1.77659	0.537408	0.517758	0.765207	0.546511	0.251411	0.289752	0.370214	0.24163	1.01891	1.24544	1.15453	1.03458	1.65152	1.67626	1.13458	1.32852	2.2009	2.11636	2.02069	0.757199
0.970339	1.79661		43.8504	114.776		18.4229	71.8413		Acellular Area	1.75017	1.3236	0.683571	0.856903	0.946508	0.895409	0.906106	1.3912	0.532231	1.00641	0.743244	0.709083	1.47429	1.0176	0.934384	1.24255	2.10119	0.52801	1.53144	0.877158	0.760845	1.2684	0.938337	0.308556	0.985654	0.852948	1.03941	0.568474	1.33238	1.22833	0.157978	0.852069
0.838983	1.6483		27.6434	80.9263		5.17878	37.1022
1.02141	1.76271		46.198	98.2056		17.7227	46.5102
0.990826	1.32025		57.2291	99.5831		28.0474	28.8879
1.21713	1.24771		57.8907	80.175		25.4884	51.3737
0.770642	1.65749		56.5281	90.8866		33.2832	48.6002
0.801697	1.33028		71.2725	87.0683		33.8489	49.1808
1.10711	1.70948		49.3338	124.236		25.8595	75.51
1.0912	1.31071		77.7342	90.8333		26.4302	54.6248
	1.33298			82.8558			40.3411
	1.58749			115.53			38.487
[truncated: 11 more columns]

[truncated: 4 more sheets: Figure 4, Figure 5, Figure 5-S1, Figure 5-S2]
