# Supplementary material for: Human Erbb2-induced Erk activity robustly stimulates cycling and functional remodeling of rat and human cardiomyocytes
Source: eLife journal article supplement (doi:10.7554/elife.65512), 2021-10-19

**A**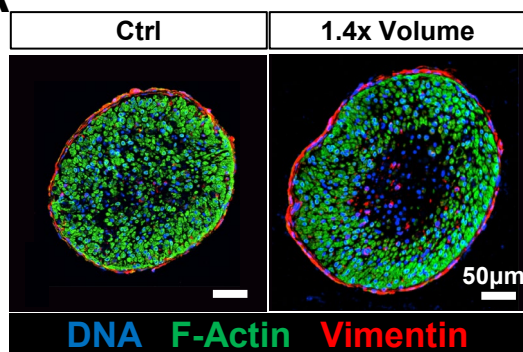**Nuclei per CS**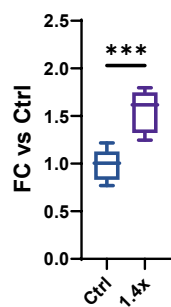**Total CSA**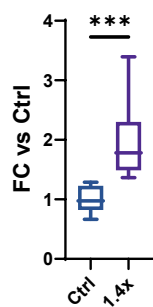**Acellular Area**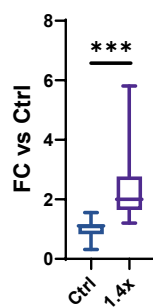**CS Analysis**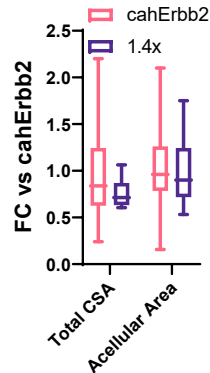**B****Passive Force at 12% Stretch**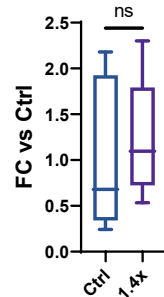**C**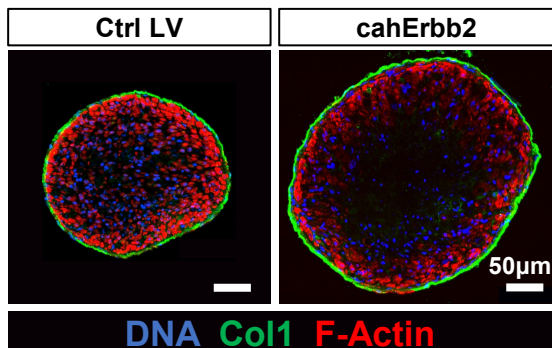**Col1 Abundance**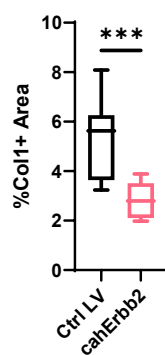**D****Vimentin Abundance**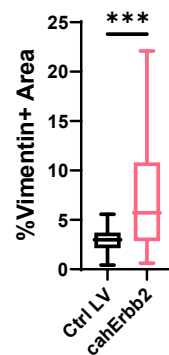**E**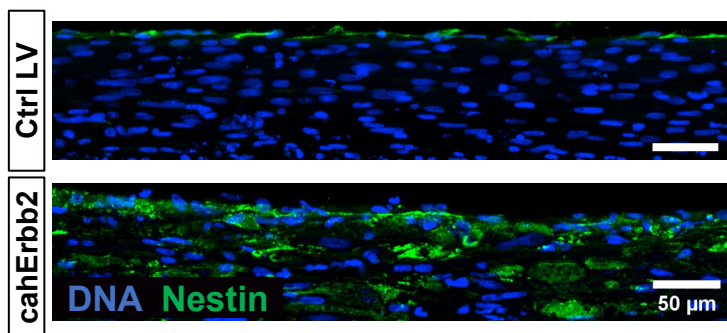**Nestin Abundance**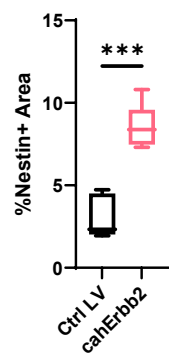

Supplement: supp [file elife-65512-supp-v1.zip]
