# Supplementary figures and images for: Human Erbb2-induced Erk activity robustly stimulates cycling and functional remodeling of rat and human cardiomyocytes
Source: eLife journal article supplement (doi:10.7554/elife.65512), 2021-10-19

**A****Pathway**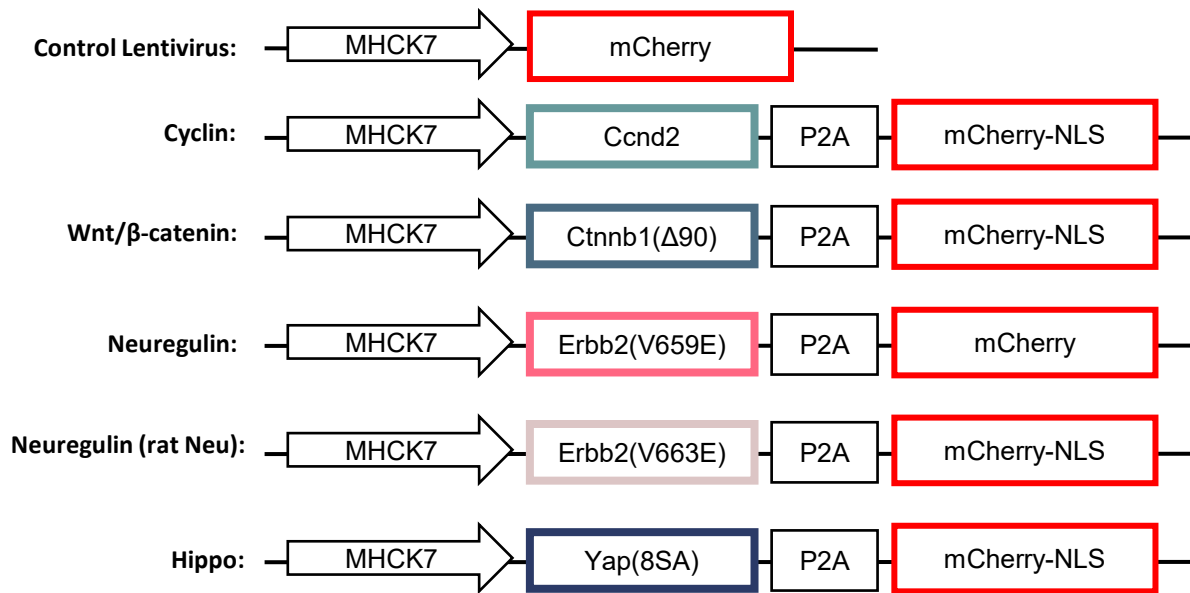**B****Transduction Efficiency  
(hiPSC-CMs)**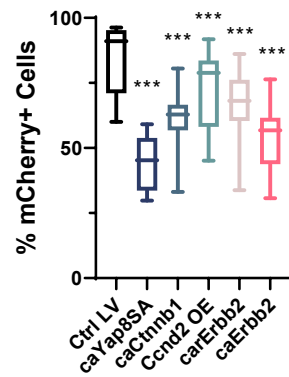**C****Transduction Efficiency  
(NRVMs)**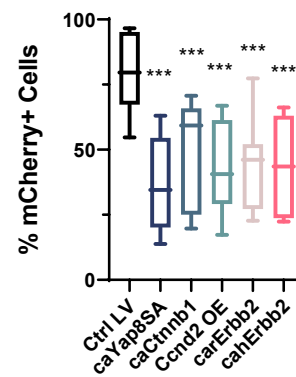

Supplement: supp [file elife-65512-supp-v1.zip]

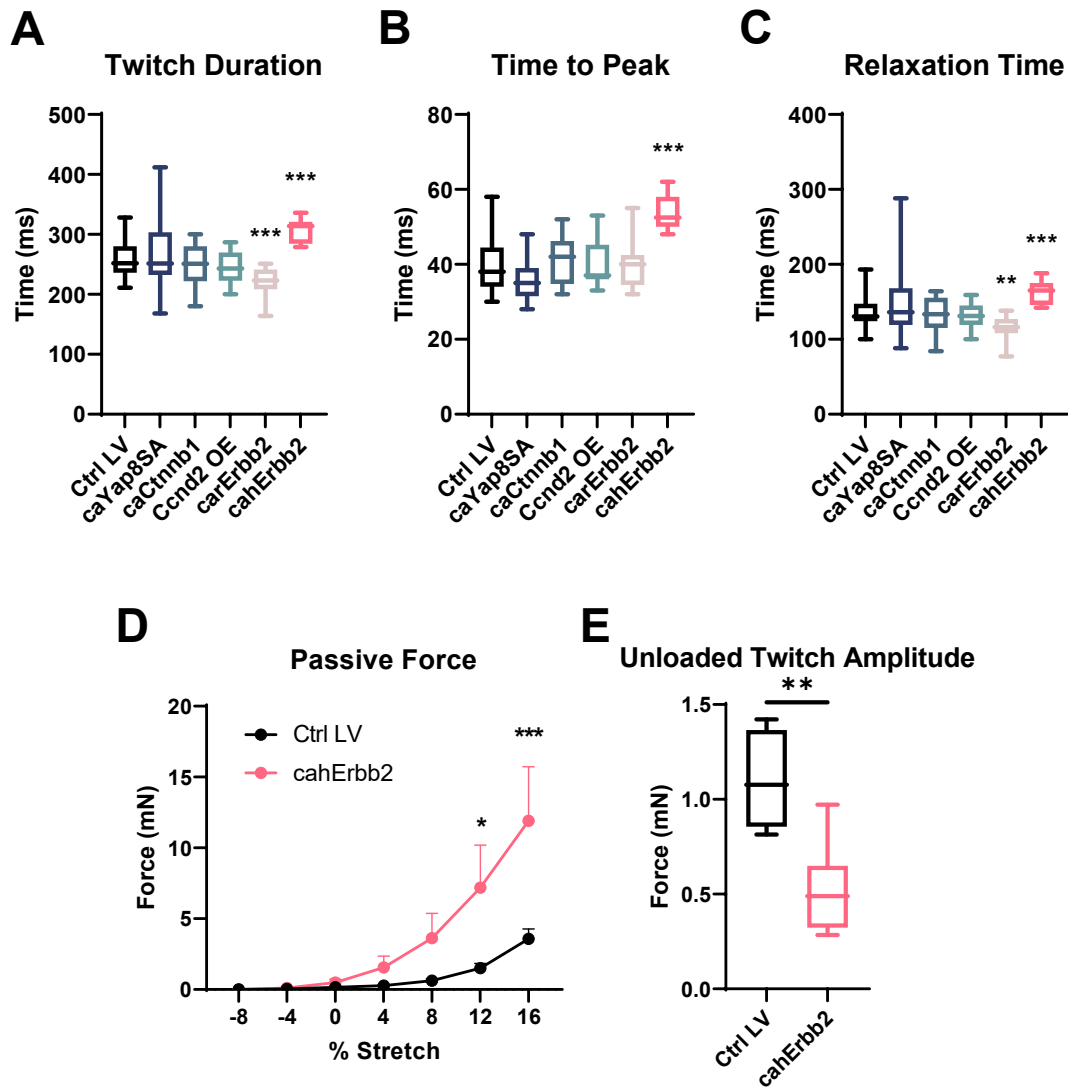

Supplement: supp [file elife-65512-supp-v1.zip]

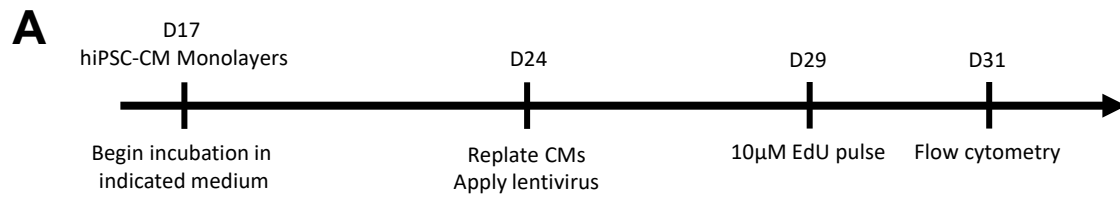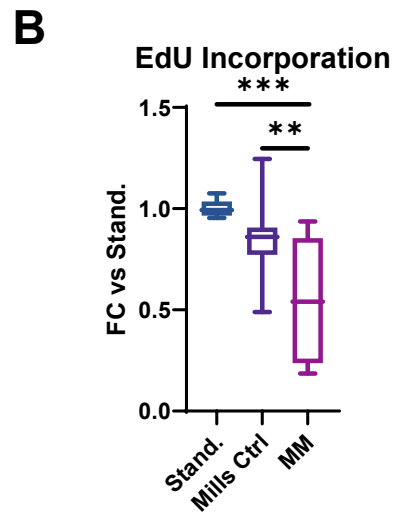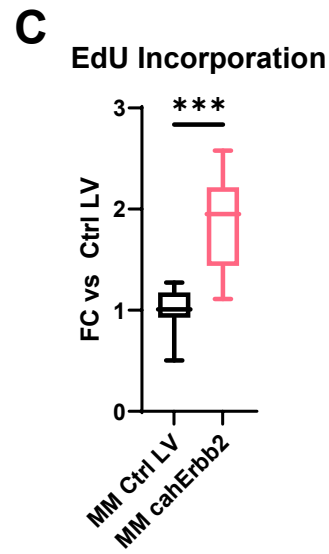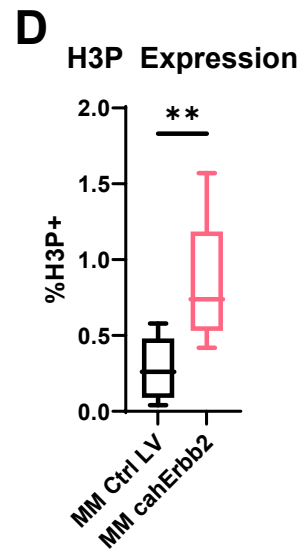

Supplement: supp [file elife-65512-supp-v1.zip]

## Non-CM Fraction

**A**

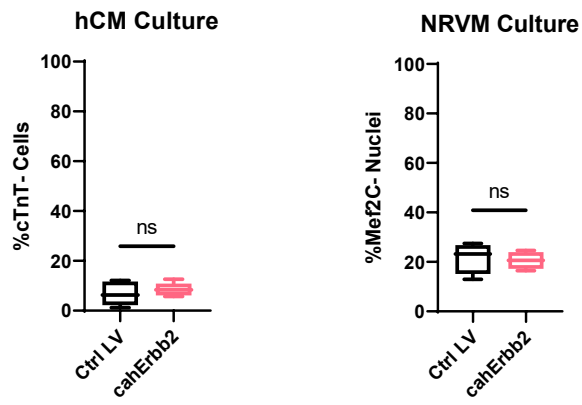

## CM Size

**B**

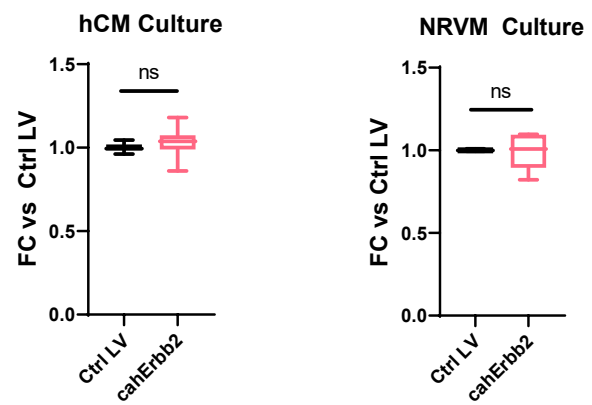

Supplement: supp [file elife-65512-supp-v1.zip]

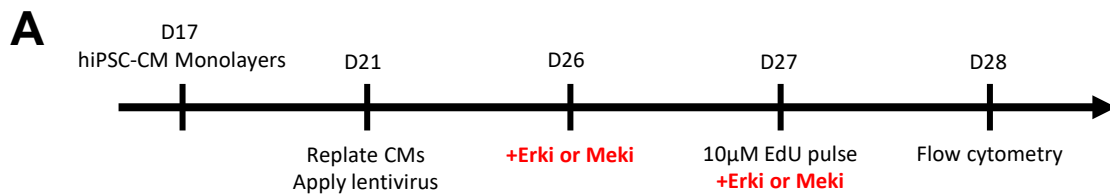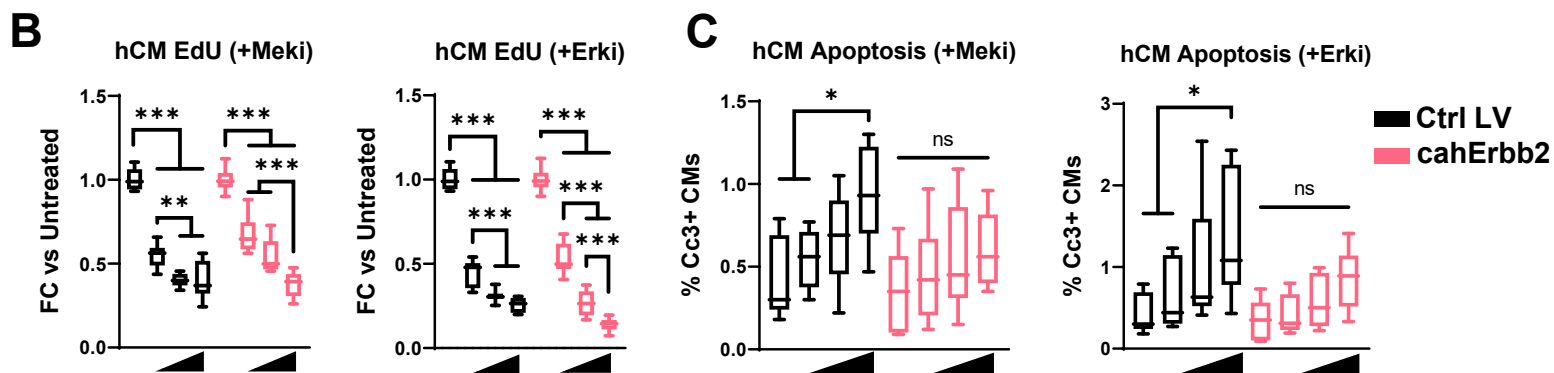

Supplement: supp [file elife-65512-supp-v1.zip]

**A**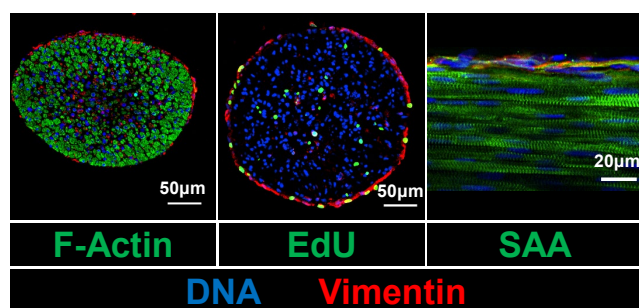**B**

CM EdU Incorporation

Total EdU Incorporation

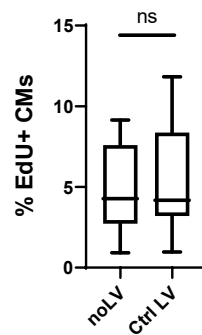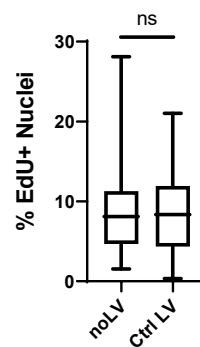**C**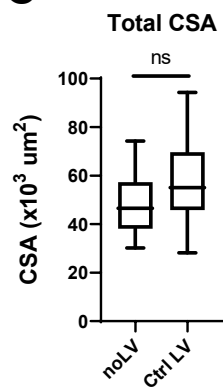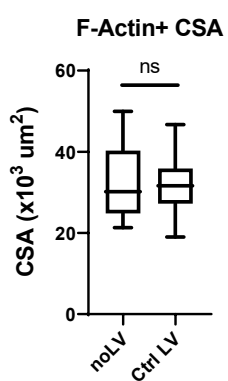**D**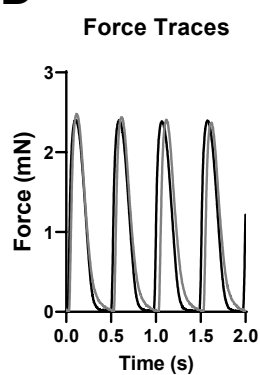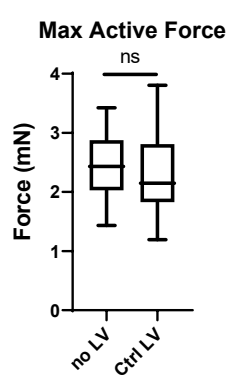**E**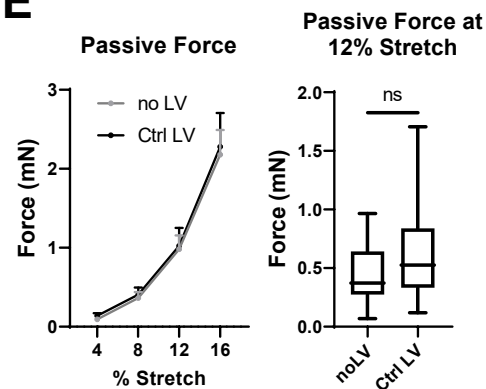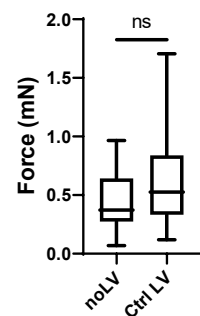

Supplement: supp [file elife-65512-supp-v1.zip]

**A**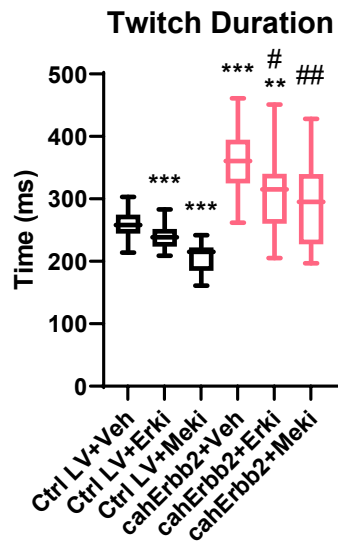**B**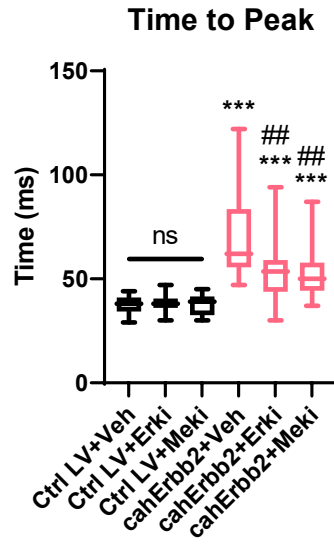**C**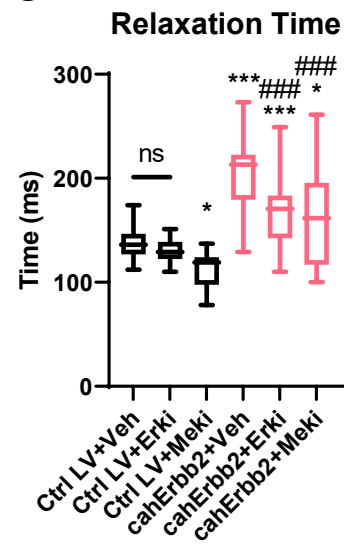

Supplement: supp [file elife-65512-supp-v1.zip]

**A**

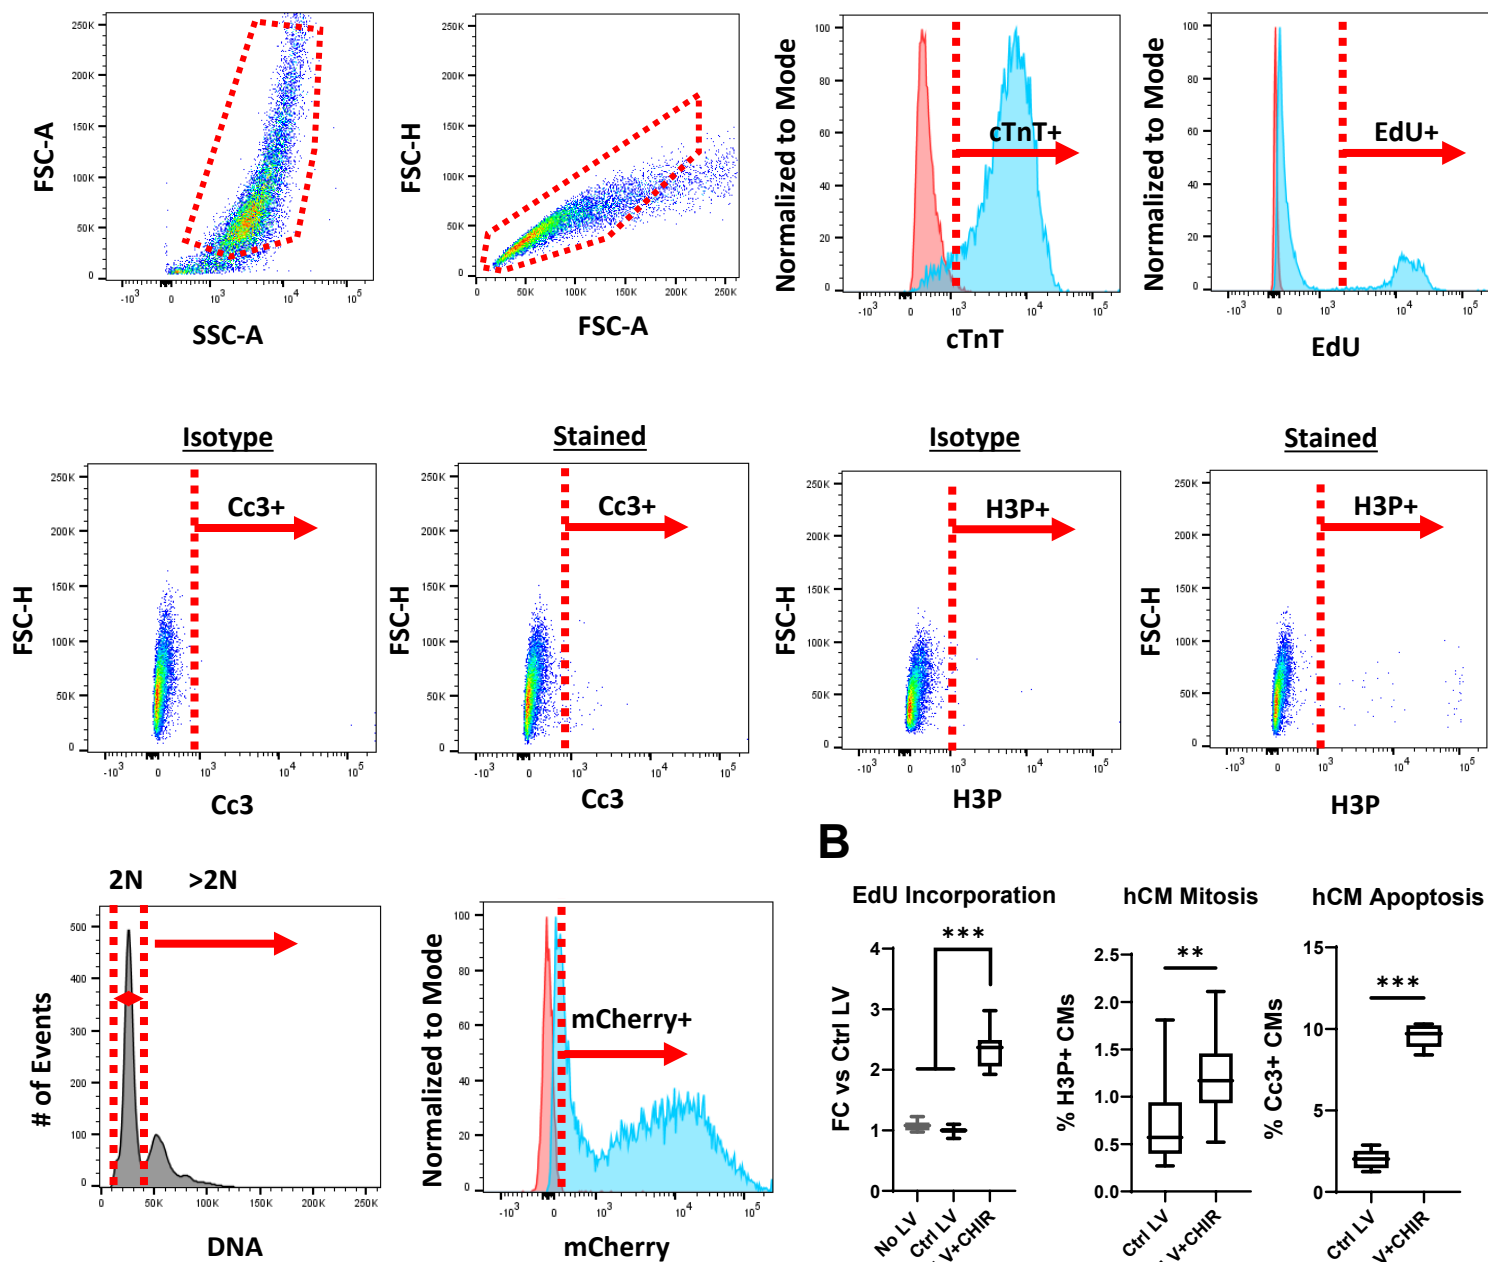

**B**

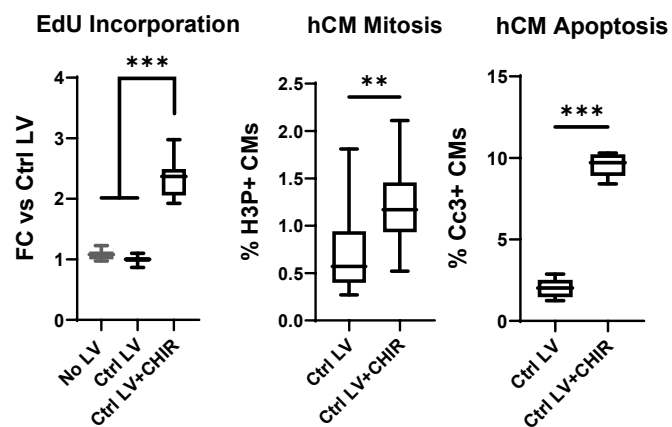

Supplement: supp [file elife-65512-supp-v1.zip]
